# Supplementary material
Source: PubMed Central journal article supplement (PMC2826092)
Supplement: vetres-41-32-s1.pdf [file vetres-41-32-s1.pdf]

## **On line material**

**Supplementary data. A metapopulation model to simulate West Nile virus circulation in the old world.**

***Model description***

The model is a deterministic discrete time meta-population model with a daily time step. A population is defined here as a group of animals (vectors or hosts) that share the same location (or places for migratory populations) and that have the same annual life cycle. The epidemiological system is represented by a set  $Y$  of host populations that share during their annual life cycle a set  $X$  of locations where vector populations live. Some of the host populations are migratory and move between locations during the year.

*1. State variables*

A host population is described by the distribution of animals according to their health state (the set of which is denoted  $Z$ ) and to their age class (the set of which is denoted  $W$ ). Three health states are considered:  $S$  (susceptible),  $I$  (viraemic), and  $R$  (immune). Several age classes are also distinguished:

- $n$  nestlings age classes numbered 1- $n$  ( $N_1$ : newly hatched animals,  $N_n$ :  $n$ -days old nestlings that will leave the nest the following day),
- juveniles ( $J$ ) that have left the nest but do not participate in reproduction,
- reproductive adults ( $A$ ).

At day  $t$ , the proportion of birds in age class  $a$ , health state  $z$  of population  $y$  is denoted  $H_{y,a,z}(t)$ . Regarding to species that reproduce all over the year, population size was assumed constant and, whatever the day  $t$ ,  $\sum_{a \in W, z \in Z} H_{y,a,z}(t) = 1$ . For species with a seasonal reproduction,

population size varies during the annual life cycle, between a minimal value at the beginning

of the hatch period and a maximal value at the end of this period. Population dynamic parameters were adjusted so that the preceding equality holds on the 1st day of the hatch period.

A vector population is described by the distribution of adults according to their health state:  $S$  (susceptible),  $E$  (latent, during the extrinsic incubation period) and  $I$  (infectious: when biting, the vector will transmit the virus to the host). At day  $t$ , the proportion of vectors living at location  $x$  that have the health state  $z$  is denoted  $V_{x,z}(t)$ : whatever the day  $t$ ,  $\sum_{z \in Z} V_{x,z}(t) = 1$ .

Vector abundance varies according to a site-specific parameter:  $\omega_x(\tau)$ , that represents the size of the population at calendar day  $\tau$  (1-365), relatively to the maximal vector abundance at location  $x$  during the annual cycle: whatever the calendar day,  $\omega_x(\tau) \leq 1$ .

## 2. Population dynamic

### 2.1. Birds

Let  $h_{x,a,z}$  denote the state of the bird population  $y$  after ageing, death and renewal processes. It is computed using Equations (1–3):

$$h_{y,A,z} = [H_{y,A,z}(t) + r_y(\tau)H_{y,J,z}(t)](1 - \mu_A) \quad (1)$$

where:  $\tau$  is the calendar day,

$\mu_A$  is the daily adult mortality rate,

$r_y(\tau)$  is the daily juvenile recruitment rate in the adult age class (transfer from the  $J$  to the  $A$  age class) for host population  $y$  and calendar day  $\tau$ .

$$h_{y,J,z} = [(1 - r_y(\tau))H_{y,J,z}(t) + H_{y,N_n,z}(t)](1 - \mu_J) \quad (2)$$

where  $\mu_J$  is the daily juvenile mortality rate.

$$h_{y,N_i,z} = H_{y,N_{i-1},z}(t)(1 - \mu_N) \quad \text{where } \mu_N \text{ is the daily nestlings mortality rate.} \quad (3)$$

Nestling always hatch in the S state, as indicated by Eqs. 4 and 5, where  $b_y(\tau)$  is the daily per-capita hatch rate for host population  $y$  and calendar day  $\tau$ .

$$h_{y,N_1,S} = \sum_{z \in Z} (1 - \mu_y) b_y(\tau) H_{y,A,z}(t) \quad (4)$$

$$h_{y,N_1,I} = h_{y,N_1,R} = 0. \quad (5)$$

## 2.2. Vectors

Let  $v_{x,z}$  denote the state of the vector population at location  $x$  after adults daily mortality and emergence. Neglecting vertical transmission of WNV,  $v_{x,z}$  is computed using Equations (6–8):

$$v_{x,S} = V_{x,S}(t)(1 - \mu_v) + \mu_v \text{ where } \mu_v \text{ is the vector daily mortality rate} \quad (6)$$

$$v_{x,E} = V_{x,E}(t)(1 - \mu_v) \quad (7)$$

$$v_{x,I} = V_{x,I}(t)(1 - \mu_v). \quad (8)$$

## 3. Infection dynamic

### 3.1. Birds

At each time step, infectious vectors bite susceptible birds that become infected (Eq. 9) according to a population- and age-specific force of infection  $\lambda_{y,a}(t)$ . Transition rate from health state I to R is constant (Eqs. 10–12). Birds are assumed to acquire a lifelong immunity [26], there is thus no transition from R to S.

$$H_{y,a,S}(t+1) = h_{y,a,S}(1 - \lambda_{y,a}(t)) \quad (9)$$

$$H_{y,a,I}(t+1) = h_{y,a,I}(1 - 1/T_v) + h_{y,a,S} \lambda_{y,a}(t) \quad (10)$$

where  $T_v$  is the duration of viraemia (health state I) in days.

$$H_{y,a,R}(t+1) = h_{y,a,R} + h_{y,a,I}(1/T_v) \quad (11)$$

The force of infection is computed according to Equation (12):

$$\lambda_{y,a}(t) = 1 - \exp(-RR_a K_x \omega_x(\tau) v_{x,I} (1/Tg_x)) \quad (12)$$

where: –  $x$  is the location of population  $y$  at time step  $t$ ,

–  $K_x$  is the vector-host ratio for location  $x$ , when vector abundance reaches its maximal value, *i.e.*  $\omega_x(\tau) = 1$ ,

–  $RR_a$  is the bite relative risk for age class  $a$ ,

–  $Tg_x$  is the duration of the gonotrophic cycle for vectors living at location  $x$  (days).

In Equation (12) the number of infectious bites per host is assumed to follow a Poisson distribution. The expression  $1/Tg_x$  denotes the proportion of vectors that bite a host at a given day, and  $v_{x,I}$  is the proportion of infectious vectors. Thus, taking into account age-specific bite relative risk as well as the yearly variations of vector abundance, the expression  $RR_a K_x \omega_x(\tau) v_{x,I} (1/Tg_x)$  denotes the number of infectious bites per host of age class  $a$ . Considering this number as the parameter of the Poisson distribution, Equation 12 gives the probability that, for a given bird of population  $y$  and age class  $a$ , the number of infectious bites is not zero.

### 3.2. Vectors

At each time step, susceptible vectors bite viraemic birds and become infected (Eq. 14) according to a site-specific force of infection  $\lambda_x(t)$ . Transition rate from health state E to I is constant (Eqs. 13–15).

$$V_{x,S}(t+1) = v_{x,S} (1 - \lambda_x(t)) \quad (13)$$

$$V_{x,E}(t+1) = v_{x,E} (1 - 1/T_x) + v_{x,S} \lambda_x(t) \quad (14)$$

where  $Tx_x$  is the duration of the extrinsic incubation period of vectors living at location  $x$  (state  $E$ ).

$$V_{x,I}(t+1) = v_{x,I} + v_{x,E}(1/Tx_x). \quad (15)$$

The force of infection applied to vectors living at location  $x$  is defined in Equation (16):

$$\lambda_x(t) = \frac{1}{Tg_x} \sum_{y \in Y} \sum_{a \in W} q_{y,a} p_{y,a} \quad (16)$$

where: –  $q_{y,a}$  is the proportion of bites that occur on birds of population  $y$  and age

class  $a$ :

$$q_{y,a} = \frac{\omega_{x,y}(t) RR_a \sum_{z \in Z} h_{y,a,z}}{\sum_{y' \in Y} \sum_{a \in W} \sum_{z \in Z} \omega_{x,y'}(\tau) RR_a h_{y',a,z}}$$

with  $\omega_{x,y}(\tau)$  the demographic importance of population  $y$  at location  $x$  at the calendar day  $\tau$  (zero if the population is not present);

–  $p_{y,a}$  is the proportion of viraemic birds in population  $y$  and age class  $a$ :

$$p_{y,a} = \frac{h_{y,a,I}}{\sum_{z \in Z} h_{y,a,z}}.$$

In Equation (16), the force of infection is the product of the proportion of vectors that bite  $1/Tg_x$  by the proportion of bites that occur on a viraemic bird. To compute the latter term, because of age-specific bite relative risk and because several populations may be present, we sum the prevalence rates of viraemic birds  $p_{y,a}$  in the different populations and age classes, and weight each prevalence by the proportion of bites that occur on the corresponding birds  $q_{y,a}$ .

### 3.3. Incidental hosts

The daily infection rate of incidental hosts is assumed proportional to that of adult birds living

at the same place, the proportionality factor being host-specific. The incidence rate of infections in incidental hosts over a given time period from day  $t_1$  to day  $t_2$  may then be computed using Equation (17):

$$p_{x,h} = 1 - \exp\left(-\varphi_h \sum_{t=t_1}^{t_2} \lambda_{y,A}(t)\right) \quad (17)$$

where: –  $y$  is the resident bird population living at location  $x$ ,

–  $\varphi_h$  is the bite relative risk for host  $h$ , taking as a reference the force of infection for adult birds.
